# Supplementary material for: Taxonomic Classification of Bacterial 16S rRNA Genes Using Short Sequencing Reads: Evaluation of Effective Study Designs
Source: PLoS One. 2013 Jan 7;8(1):e53608. doi: 10.1371/journal.pone.0053608 (PMC3538547; doi:10.1371/journal.pone.0053608)
Supplement: Table S5 — Summary of analyses for V3. For each sequencing configuration, taxonomic rank and bootstrap confidence value C, we provide the following information pertaining to the interval [C.C+4] (except for the case C = 100, in which the interval is of size 1): Interval_TP - median number of true predictions in leave-k-out tests (out of 100 repeats); Interval_FP - median number of false predictions in leave-k-out tests (out of 100 repeats); Interval_precision - precision in leave-k-out tests (%), calculated from Interval_TP and Interval_FP; Interval_FPR - false prediction rate in leave-k-out tests (%), calculated from Interval_TP and Interval_FP; threshold for FPR – FPR values for which the confidence value is suitable as a threshold (note that not all rows will contain this field, as we tested only a limited set of FPR values), each threshold is the median of 100 thresholds obtained for the same desired FPR from 100 repeats of the leave-k-out test. We also provide the following information for the interval [C.100]: Env_coverage - coverage of environmental sequences (%); Cumulative_TP - number of true predictions in leave-k-out tests, calculated from Interval_TP; Cumulative_FP - number of false predictions in leave-k-out tests, calculated from Interval_FP; Cumulative_precision – precision of leave-k-out tests (%), calculated from Cumulative_TP and Cumulative_FP; Cumulative_FPR – false prediction rate of leave-k-out tests (%), calculated from Cumulative_TP and Cumulative_FP. (XLS) [file pone.0053608.s011.xls]

## Sheet: Sheet1
Table S5. Summary of analyses for V3, for all experimental designs examined.
The table contains the following columns: • Sequencing_configuration • Rank • Confidence (the value of this column is referred to as ‘C’ in the description of subsequent columns) • Columns pertaining to the interval [C..C+4] (except for the case C=100, in which the interval is of size 1): o Interval_TP – median number of true predictions in leave-k-out tests (out of 100 repeats) o Interval_FP – m…
Sequencing_configuration	Rank	Confidence	Interval_TP	Interval_FP	Interval_precision	Interval_FPR	threshold for FPR	Env_coverage	Cumulative_TP	Cumulative_FP	Cumulative_precision	Cumulative_FPR
single100	genus	0	1	14	6.66667	93.3333	0.8	99.2137	6178	1914	76.347	23.653
single100	genus	5	25	55	31.25	68.75	0.75	98.5925	6177	1900	76.4764	23.5236
single100	genus	10	17	74.5	18.5792	81.4208		96.709	6152	1845	76.9288	23.0712
single100	genus	15	32	106	23.1884	76.8116		95.0144	6135	1770.5	77.6042	22.3958
single100	genus	20	36	137	20.8092	79.1908		93.293	6103	1664.5	78.571	21.429
single100	genus	25	85	156	35.2697	64.7303	0.65,0.7	91.4825	6067	1527.5	79.8868	20.1132
single100	genus	30	59	111	34.7059	65.2941	0.6	89.3643	5982	1371.5	81.349	18.651
single100	genus	35	78	118	39.7959	60.2041		87.077	5923	1260.5	82.4528	17.5472
single100	genus	40	93	148	38.5892	61.4108		84.7501	5845	1142.5	83.6494	16.3506
single100	genus	45	146	100	59.3496	40.6504	0.4,0.45,0.5,0.55	82.2911	5752	994.5	85.259	14.741
single100	genus	50	375	106	77.9626	22.0374		80.0757	5606	894.5	86.2395	13.7605
single100	genus	55	169	97	63.5338	36.4662		78.2196	5231	788.5	86.9009	13.0991
single100	genus	60	197	142	58.1121	41.8879		75.6361	5062	691.5	87.9812	12.0188
single100	genus	65	185	86.5	68.14	31.86	0.3,0.35	73.7877	4865	549.5	89.8513	10.1487
single100	genus	70	209	63	76.8382	23.1618	0.2,0.25	72.0859	4680	463	90.9975	9.00253
single100	genus	75	292.5	76	79.3758	20.6242		70.5237	4471	400	91.7881	8.21187
single100	genus	80	376	81	82.2757	17.7243		68.2263	4178.5	324	92.804	7.196
single100	genus	85	419	97	81.2015	18.7984		66.0136	3802.5	243	93.9933	6.00667
single100	genus	90	642	64	90.9348	9.06516	0.08,0.09,0.1,0.15	59.4447	3383.5	146	95.8634	4.13656
single100	genus	95	2165.5	77	96.5663	3.43367	0.03,0.04,0.05,0.06,0.07	54.3702	2741.5	82	97.0958	2.9042
single100	genus	100	576	5	99.1394	0.860585	0.005,0.01,0.02	19.8233	576	5	99.1394	0.860585
single100	family	0	2	2	50	50	0.8	99.6379	7254.5	784	90.2469	9.75306
single100	family	5	4	10	28.5714	71.4286		99.3642	7252.5	782	90.267	9.73303
single100	family	10	3	24	11.1111	88.8889		98.6141	7248.5	772	90.3747	9.62533
single100	family	15	17	45	27.4194	72.5806	0.7,0.75	97.7584	7245.5	748	90.6424	9.3576
single100	family	20	27	77	25.9615	74.0385		96.6306	7228.5	703	91.1366	8.86339
single100	family	25	44	34	56.4103	43.5897	0.6,0.65	95.4942	7201.5	626	92.0026	7.99744
single100	family	30	64	110	36.7816	63.2184		94.2614	7157.5	592	92.3608	7.6392
single100	family	35	48.5	55	46.8599	53.1401	0.45,0.5,0.55	93.2013	7093.5	482	93.6374	6.36262
single100	family	40	48	45	51.6129	48.3871	0.4	91.908	7045	427	94.2853	5.71467
single100	family	45	59	32	64.8352	35.1648	0.35	90.5569	6997	382	94.8231	5.17685
single100	family	50	257.5	49	84.0131	15.9869		89.1176	6938	350	95.1976	4.80241
single100	family	55	218	29	88.2591	11.7409		87.5624	6680.5	301	95.6886	4.31139
single100	family	60	115.5	72	61.6	38.4		86.2982	6462.5	272	95.9611	4.0389
single100	family	65	110	52	67.9012	32.0988	0.3	84.9428	6347	200	96.9452	3.05483
single100	family	70	116	23	83.4532	16.5468	0.15,0.2,0.25	83.6654	6237	148	97.6821	2.31793
single100	family	75	178	12	93.6842	6.31579	0.06,0.07,0.08,0.09,0.1	82.0609	6121	125	97.9987	2.00128
single100	family	80	282	11	96.2457	3.75427		80.0411	5943	113	98.1341	1.86592
single100	family	85	368	27	93.1646	6.83544		78.0669	5661	102	98.2301	1.76991
single100	family	90	648	47	93.2374	6.76259		73.6642	5293	75	98.6028	1.39717
single100	family	95	2987	26	99.1371	0.862927	0.01,0.02,0.03,0.04,0.05	68.1281	4645	28	99.4008	0.599187
single100	family	100	1658	2	99.8795	0.120482	0.001,0.005	33.6967	1658	2	99.8795	0.120482
single100	order	0	0	1	0	100	0.8	99.7996	8152	153.5	98.1518	1.84817
single100	order	5	1	4	20	80		99.6205	8152	152.5	98.1636	1.83635
single100	order	10	0	13	0	100		99.1891	8151	148.5	98.2107	1.78926
single100	order	15	1	12	7.69231	92.3077	0.75	98.7189	8151	135.5	98.3648	1.63519
single100	order	20	2	15	11.7647	88.2353	0.7	98.1142	8150	123.5	98.5073	1.49272
single100	order	25	7	10	41.1765	58.8235	0.4,0.45,0.5,0.55,0.6,0.65	97.3506	8148	108.5	98.6859	1.31412
single100	order	30	8	9	47.0588	52.9412	0.35	96.6102	8141	98.5	98.8045	1.19546
single100	order	35	11	6	64.7059	35.2941		95.7783	8133	89.5	98.9115	1.08848
single100	order	40	13	10	56.5217	43.4783		95.0613	8122	83.5	98.9824	1.01761
single100	order	45	16	12	57.1429	42.8571	0.3	94.2874	8109	73.5	99.1017	0.898258
single100	order	50	23.5	7	77.0492	22.9508	0.15,0.2,0.25	93.4624	8093	61.5	99.2458	0.754185
single100	order	55	28	4	87.5	12.5	0.06,0.07,0.08,0.09,0.1	92.6651	8069.5	54.5	99.3291	0.670852
single100	order	60	39	3	92.8571	7.14286	0.05	91.8522	8041.5	50.5	99.3759	0.624073
single100	order	65	44	3	93.617	6.38298		91.1124	8002.5	47.5	99.4099	0.590062
single100	order	70	56	6	90.3226	9.67742		90.1967	7958.5	44.5	99.444	0.556041
single100	order	75	88	8	91.6667	8.33333		89.1105	7902.5	38.5	99.5152	0.484826
single100	order	80	118.5	3	97.5309	2.46914	0.02,0.03,0.04	87.8772	7814.5	30.5	99.6112	0.388783
single100	order	85	190	4.5	97.6864	2.31363	0.01	86.446	7696	27.5	99.6439	0.356056
single100	order	90	352.5	4	98.878	1.12202	0.005	84.3789	7506	23	99.6945	0.305485
single100	order	95	3113	15	99.5205	0.47954		81.4511	7153.5	19	99.7351	0.264901
single100	order	100	4040.5	4	99.9011	0.0989	0.001	56.9731	4040.5	4	99.9011	0.0989
single100	class	0	0	0	NA	NA	0.7	99.9993	8271.5	69.5	99.1668	0.833233
single100	class	5	0	3	0	100		99.9658	8271.5	69.5	99.1668	0.833233
single100	class	10	0	8	0	100		99.7941	8271.5	66.5	99.2024	0.797553
single100	class	15	1	5.5	15.3846	84.6154	0.6,0.65	99.4094	8271.5	58.5	99.2977	0.702281
single100	class	20	1	8	11.1111	88.8889		98.9021	8270.5	53	99.3632	0.636751
single100	class	25	2	6	25	75	0.5,0.55	98.3243	8269.5	45	99.4588	0.541223
single100	class	30	2	5	28.5714	71.4286	0.35,0.4,0.45	97.7236	8267.5	39	99.5305	0.469512
single100	class	35	4	3	57.1429	42.8571	0.25,0.3	97.159	8265.5	34	99.5903	0.409663
single100	class	40	7	4	63.6364	36.3636		96.6408	8261.5	31	99.6262	0.373832
single100	class	45	9	6	60	40	0.2	96.04	8254.5	27	99.674	0.326028
single100	class	50	12	2	85.7143	14.2857	0.03,0.04,0.05,0.06,0.07,0.08,0.09,0.1,0.15	95.4768	8245.5	21	99.746	0.254037
single100	class	55	15	2	88.2353	11.7647		94.8482	8233.5	19	99.7698	0.230233
single100	class	60	21.5	1	95.5556	4.44444	0.005,0.01,0.02	94.1447	8218.5	17	99.7936	0.206423
single100	class	65	20	1	95.2381	4.7619		93.4044	8197	16	99.8052	0.194813
single100	class	70	25	1	96.1538	3.84615		92.6375	8177	15	99.8169	0.183105
single100	class	75	42	1	97.6744	2.32558		91.6804	8152	14	99.8286	0.171443
single100	class	80	63	0	100	0		90.5805	8110	13	99.84	0.160039
single100	class	85	93.5	0	100	0		89.3417	8047	13	99.8387	0.16129
single100	class	90	229.5	1	99.5662	0.433839		87.7548	7953.5	13	99.8368	0.163183
single100	class	95	2095	9	99.5722	0.427757		84.6135	7724	12	99.8449	0.155119
single100	class	100	5629	3	99.9467	0.053267	0.001	64.8079	5629	3	99.9467	0.053267
single100	phylum	0	0	0	NA	NA	0.7	100	8340	38	99.5464	0.453569
single100	phylum	5	0	1	0	100		99.9891	8340	38	99.5464	0.453569
single100	phylum	10	0	3	0	100		99.9222	8340	37	99.5583	0.441686
single100	phylum	15	0	3	0	100		99.7705	8340	34	99.594	0.406019
single100	phylum	20	0	7	0	100		99.4856	8340	31	99.6297	0.370326
single100	phylum	25	0	5	0	100	0.55,0.6,0.65	99.1058	8340	24	99.7131	0.286944
single100	phylum	30	1	5	16.6667	83.3333	0.45,0.5	98.7462	8340	19	99.7727	0.2273
single100	phylum	35	2	2	50	50	0.2,0.25,0.3,0.35,0.4	98.2654	8339	14	99.8324	0.167604
single100	phylum	40	5	1	83.3333	16.6667	0.15	97.8924	8337	12	99.8563	0.14373
single100	phylum	45	5	3	62.5	37.5	0.1	97.508	8332	11	99.8682	0.131847
single100	phylum	50	6	1	85.7143	14.2857	0.06,0.07,0.08,0.09	97.0755	8327	8	99.904	0.095981
single100	phylum	55	11	3	78.5714	21.4286		96.6384	8321	7	99.9159	0.084054
single100	phylum	60	20	0	100	0	0.005,0.01,0.02,0.03,0.04,0.05	96.1586	8310	4	99.9519	0.048112
single100	phylum	65	20	0	100	0		95.5233	8290	4	99.9518	0.048228
single100	phylum	70	20	1	95.2381	4.7619		94.7965	8270	4	99.9517	0.048344
single100	phylum	75	26	0	100	0	0.001	94.0712	8250	3	99.9637	0.03635
single100	phylum	80	42	0	100	0		93.1094	8224	3	99.9635	0.036465
single100	phylum	85	83	0	100	0		91.7854	8182	3	99.9633	0.036652
single100	phylum	90	153	0	100	0		90.0452	8099	3	99.963	0.037028
single100	phylum	95	1594	2	99.8747	0.125313		87.2624	7946	3	99.9623	0.037741
single100	phylum	100	6352	1	99.9843	0.015741		68.8845	6352	1	99.9843	0.015741
single120	genus	0	0	12	0	100	0.85	99.2711	6383	1709	78.8804	21.1196
single120	genus	5	1	26.5	3.63636	96.3636		98.8982	6383	1697	78.9975	21.0025
single120	genus	10	20	63	24.0964	75.9036	0.7,0.75,0.8	97.5321	6382	1670.5	79.2549	20.7451
single120	genus	15	47	128	26.8571	73.1429		95.7379	6362	1607.5	79.8293	20.1707
single120	genus	20	54	112	32.5301	67.4699		93.9506	6315	1479.5	81.0187	18.9813
single120	genus	25	43	119	26.5432	73.4568		92.1421	6261	1367.5	82.0738	17.9262
single120	genus	30	56	104	35	65	0.6,0.65	90.1812	6218	1248.5	83.2786	16.7214
single120	genus	35	89	102	46.5969	53.4031	0.55	88.1476	6162	1144.5	84.3359	15.6641
single120	genus	40	83.5	111	42.9306	57.0694		86.0942	6073	1042.5	85.3489	14.6511
single120	genus	45	111	111	50	50	0.45,0.5	84.0425	5989.5	931.5	86.541	13.459
single120	genus	50	351.5	146	70.6533	29.3467	0.35,0.4	81.8323	5878.5	820.5	87.7519	12.2481
single120	genus	55	196	121	61.8297	38.1703		79.7108	5527	674.5	89.1236	10.8764
single120	genus	60	148	84.5	63.6559	36.3441		77.9612	5331	553.5	90.5939	9.40607
single120	genus	65	186	76	70.9924	29.0076	0.25,0.3	76.0735	5183	469	91.7021	8.29795
single120	genus	70	195	60.5	76.3209	23.6791	0.2	74.027	4997	393	92.7087	7.29128
single120	genus	75	254	62.5	80.2528	19.7472		72.1659	4802	332.5	93.5242	6.4758
single120	genus	80	317	57	84.7594	15.2406	0.15	70.038	4548	270	94.396	5.60398
single120	genus	85	454	76	85.6604	14.3396		67.8211	4231	213	95.207	4.79298
single120	genus	90	638	53	92.33	7.67004	0.07,0.08,0.09,0.1	63.9791	3777	137	96.4997	3.50026
single120	genus	95	2355	76	96.8737	3.12629	0.03,0.04,0.05,0.06	57.7844	3139	84	97.3937	2.60627
single120	genus	100	784	8	98.9899	1.0101	0.005,0.01,0.02	24.0909	784	8	98.9899	1.0101
single120	family	0	0	2	0	100	0.75	99.6817	7423	619.5	92.2972	7.70283
single120	family	5	1	4	20	80		99.5488	7423	617.5	92.3201	7.67987
single120	family	10	4	17	19.0476	80.9524		99.0805	7422	613.5	92.3651	7.63487
single120	family	15	13	39	25	75		98.261	7418	596.5	92.5572	7.44276
single120	family	20	26	93.5	21.7573	78.2427		97.2077	7405	557.5	92.9984	7.00157
single120	family	25	16	36	30.7692	69.2308	0.6,0.65,0.7	96.1189	7379	464	94.0839	5.9161
single120	family	30	63.5	39	61.9512	38.0488	0.35,0.4,0.45,0.5,0.55	94.9406	7363	428	94.5065	5.49352
single120	family	35	100	41	70.922	29.078		93.8666	7299.5	389	94.9405	5.0595
single120	family	40	53	38	58.2418	41.7582		92.8369	7199.5	348	95.3892	4.6108
single120	family	45	56.5	25	69.3252	30.6748	0.25,0.3	91.882	7146.5	310	95.8426	4.15745
single120	family	50	217	37	85.4331	14.5669	0.2	90.8461	7090	285	96.1356	3.86441
single120	family	55	203	62	76.6038	23.3962		89.4757	6873	248	96.5173	3.48266
single120	family	60	93	30	75.6098	24.3902		87.9527	6670	186	97.287	2.71295
single120	family	65	111	26	81.0219	18.9781	0.15	86.5739	6577	156	97.6831	2.31695
single120	family	70	120	16	88.2353	11.7647	0.09,0.1	85.3407	6466	130	98.0291	1.97089
single120	family	75	140	14	90.9091	9.09091	0.08	84.0441	6346	114	98.2353	1.76471
single120	family	80	184	10	94.8454	5.15464		82.3499	6206	100	98.4142	1.58579
single120	family	85	311	34	90.1449	9.85507		80.028	6022	90	98.5275	1.47251
single120	family	90	597	27	95.6731	4.32692	0.04,0.05,0.06,0.07	76.5512	5711	56	99.029	0.971042
single120	family	95	2962	26	99.1299	0.870147	0.01,0.02,0.03	70.7653	5114	29	99.4361	0.563873
single120	family	100	2152	3	99.8608	0.139211	0.001,0.005	42.6446	2152	3	99.8608	0.139211
single120	order	0	0	0	NA	NA	0.8	99.8469	8163.5	143	98.2785	1.72154
single120	order	5	0	2	0	100		99.8107	8163.5	143	98.2785	1.72154
single120	order	10	1	7	12.5	87.5		99.5687	8163.5	141	98.3021	1.69788
single120	order	15	1	13	7.14286	92.8571		99.0574	8162.5	134	98.3849	1.61514
single120	order	20	0	11	0	100		98.3699	8161.5	121	98.5391	1.46091
single120	order	25	1	11	8.33333	91.6667	0.7,0.75	97.6907	8161.5	110	98.6701	1.32987
single120	order	30	7	7.5	48.2759	51.7241	0.5,0.55,0.6,0.65	96.9616	8160.5	99	98.8014	1.19862
single120	order	35	6	11	35.2941	64.7059		96.2999	8153.5	91.5	98.8902	1.10976
single120	order	40	8	11	42.1053	57.8947	0.4,0.45	95.577	8147.5	80.5	99.0216	0.978367
single120	order	45	16	5	76.1905	23.8095	0.15,0.2,0.25,0.3,0.35	94.7652	8139.5	69.5	99.1534	0.846632
single120	order	50	20	5	80	20		93.978	8123.5	64.5	99.2123	0.787738
single120	order	55	16	6	72.7273	27.2727		93.3374	8103.5	59.5	99.2711	0.728899
single120	order	60	33	8	80.4878	19.5122		92.6406	8087.5	53.5	99.3428	0.657167
single120	order	65	36	6	85.7143	14.2857	0.07,0.08,0.09,0.1	91.8643	8054.5	45.5	99.4383	0.561728
single120	order	70	55	6	90.1639	9.83607	0.05,0.06	91.0614	8018.5	39.5	99.5098	0.490196
single120	order	75	55	4	93.2203	6.77966	0.03,0.04	90.2308	7963.5	33.5	99.5811	0.418907
single120	order	80	77	4	95.0617	4.93827	0.02	89.2397	7908.5	29.5	99.6284	0.37163
single120	order	85	150	4	97.4026	2.5974	0.01	88.0227	7831.5	25.5	99.6754	0.324551
single120	order	90	280	4.5	98.4183	1.58172		86.1916	7681.5	21.5	99.7209	0.279112
single120	order	95	2764	12	99.5677	0.432277	0.005	83.4725	7401.5	17	99.7708	0.229157
single120	order	100	4637.5	5	99.8923	0.107701	0.001	61.7493	4637.5	5	99.8923	0.107701
single120	class	0	0	0	NA	NA	0.7	100	8289	57	99.317	0.682962
single120	class	5	0	0	NA	NA		99.9828	8289	57	99.317	0.682962
single120	class	10	0	5	0	100		99.855	8289	57	99.317	0.682962
single120	class	15	0	5	0	100		99.5495	8289	52	99.3766	0.623426
single120	class	20	0	7	0	100		99.1389	8289	47	99.4362	0.56382
single120	class	25	1.5	6	20	80	0.45,0.5,0.55,0.6,0.65	98.6124	8289	40	99.5198	0.48025
single120	class	30	5	4	55.5556	44.4444	0.35,0.4	98.0429	8287.5	34	99.5914	0.40858
single120	class	35	2	4	33.3333	66.6667	0.3	97.5078	8282.5	30	99.6391	0.360902
single120	class	40	2	3	40	60	0.2,0.25	96.9454	8280.5	26	99.687	0.313008
single120	class	45	9	3	75	25	0.15	96.3886	8278.5	23	99.7229	0.277058
single120	class	50	7	3	70	30	0.09,0.1	95.9146	8269.5	20	99.7587	0.241269
single120	class	55	10	2	83.3333	16.6667	0.03,0.04,0.05,0.06,0.07,0.08	95.4173	8262.5	17	99.7947	0.205326
single120	class	60	12	0	100	0	0.005,0.01,0.02	94.865	8252.5	15	99.8186	0.181433
single120	class	65	15	0	100	0		94.1436	8240.5	15	99.8183	0.181697
single120	class	70	31	1	96.875	3.125		93.4841	8225.5	15	99.818	0.182028
single120	class	75	27	0	100	0		92.8254	8194.5	14	99.8294	0.170555
single120	class	80	41	1	97.619	2.38095		91.9407	8167.5	14	99.8289	0.171118
single120	class	85	74	0	100	0		90.7616	8126.5	13	99.8403	0.159715
single120	class	90	145	1	99.3151	0.684932		89.0171	8052.5	13	99.8388	0.16118
single120	class	95	1815.5	9	99.5067	0.493286		86.622	7907.5	12	99.8485	0.151525
single120	class	100	6092	3	99.9508	0.049221	0.001	68.2842	6092	3	99.9508	0.049221
single120	phylum	0	0	0	NA	NA	0.65	100	8343	30	99.6417	0.358295
single120	phylum	5	0	0	NA	NA		99.9934	8343	30	99.6417	0.358295
single120	phylum	10	0	2	0	100		99.9335	8343	30	99.6417	0.358295
single120	phylum	15	0	4	0	100		99.7668	8343	28	99.6655	0.334488
single120	phylum	20	0	6	0	100		99.4912	8343	24	99.7132	0.286841
single120	phylum	25	0	2	0	100	0.55,0.6	99.1596	8343	18	99.7847	0.215285
single120	phylum	30	1	3	25	75	0.5	98.7727	8343	16	99.8086	0.19141
single120	phylum	35	1	6	14.2857	85.7143		98.3802	8342	13	99.8444	0.155595
single120	phylum	40	1	1	50	50	0.08,0.09,0.1,0.15,0.2,0.25,0.3,0.35,0.4,0.45	97.9533	8341	7	99.9161	0.083852
single120	phylum	45	4	2	66.6667	33.3333	0.07	97.5348	8340	6	99.9281	0.071891
single120	phylum	50	4	1	80	20	0.02,0.03,0.04,0.05,0.06	97.0823	8336	4	99.952	0.047962
single120	phylum	55	6	0	100	0	0.001,0.005,0.01	96.6683	8332	3	99.964	0.035993
single120	phylum	60	7	0	100	0		96.1893	8326	3	99.964	0.036019
single120	phylum	65	9	0	100	0		95.7111	8319	3	99.964	0.036049
single120	phylum	70	21	0	100	0		95.2674	8310	3	99.9639	0.036088
single120	phylum	75	29	0	100	0		94.7034	8289	3	99.9638	0.036179
single120	phylum	80	28	0	100	0		93.9752	8260	3	99.9637	0.036306
single120	phylum	85	47	0	100	0		92.9653	8232	3	99.9636	0.03643
single120	phylum	90	109.5	0	100	0		91.5333	8185	3	99.9634	0.036639
single120	phylum	95	1262.5	1	99.9209	0.079145		89.0101	8075.5	3	99.9629	0.037136
single120	phylum	100	6813	2	99.9707	0.029347		72.0391	6813	2	99.9707	0.029347
paired100	genus	0	0	2	0	100	0.9	99.4061	6528	1578	80.5329	19.4671
paired100	genus	5	0	26	0	100		99.2035	6528	1576	80.5528	19.4472
paired100	genus	10	10	39	20.4082	79.5918	0.75,0.8,0.85	98.0042	6528	1550	80.8121	19.1879
paired100	genus	15	22	55	28.5714	71.4286		96.4968	6518	1511	81.1807	18.8193
paired100	genus	20	52	109	32.2981	67.7019		94.8795	6496	1456	81.6901	18.3099
paired100	genus	25	53.5	165	24.4851	75.5149		93.0641	6444	1347	82.7108	17.2892
paired100	genus	30	61	103	37.1951	62.8049	0.6,0.65,0.7	91.1182	6390.5	1182	84.3909	15.6091
paired100	genus	35	59	103	36.4198	63.5802		89.1535	6329.5	1079	85.4356	14.5644
paired100	genus	40	82	121	40.3941	59.6059	0.55	87.0292	6270.5	976	86.5314	13.4686
paired100	genus	45	135	131	50.7519	49.2481	0.45,0.5	85.1773	6188.5	855	87.8611	12.1389
paired100	genus	50	140	97	59.0717	40.9283	0.4	83.2045	6053.5	724	89.3176	10.6824
paired100	genus	55	136	88	60.7143	39.2857	0.35	81.1917	5913.5	627	90.4136	9.58642
paired100	genus	60	381	90	80.8917	19.1083	0.25,0.3	79.3895	5777.5	539	91.4668	8.53321
paired100	genus	65	206	73	73.8351	26.1649		76.836	5396.5	449	92.3189	7.68112
paired100	genus	70	186	51	78.481	21.519	0.2	75.0901	5190.5	376	93.2453	6.75469
paired100	genus	75	259	66	79.6923	20.3077		73.4892	5004.5	325	93.9019	6.09813
paired100	genus	80	257.5	57	81.876	18.124	0.15	71.1503	4745.5	259	94.8247	5.17534
paired100	genus	85	390	67	85.3392	14.6608		68.9114	4488	202	95.693	4.30704
paired100	genus	90	618.5	56	91.6976	8.30245	0.07,0.08,0.09,0.1	65.9874	4098	135	96.8108	3.18923
paired100	genus	95	2443.5	67	97.3312	2.66879	0.03,0.04,0.05,0.06	60.0561	3479.5	79	97.78	2.22004
paired100	genus	100	1036	12	98.855	1.14504	0.01,0.02	27.9493	1036	12	98.855	1.14504
paired100	family	0	0	1	0	100	0.7	99.7579	7503	529.5	93.408	6.59197
paired100	family	5	0	7	0	100		99.6956	7503	528.5	93.4197	6.58034
paired100	family	10	4	10	28.5714	71.4286		99.3473	7503	521.5	93.5012	6.49885
paired100	family	15	6	15	28.5714	71.4286		98.6698	7499	511.5	93.6146	6.38537
paired100	family	20	8	24	25	75		97.777	7493	496.5	93.7856	6.21441
paired100	family	25	9	38	19.1489	80.8511		96.7831	7485	472.5	94.0622	5.9378
paired100	family	30	36	74.5	32.5792	67.4208	0.6,0.65	95.84	7476	434.5	94.5073	5.4927
paired100	family	35	94	48	66.1972	33.8028	0.3,0.35,0.4,0.45,0.5,0.55	94.8077	7440	360	95.3846	4.61538
paired100	family	40	73	41	64.0351	35.9649		93.7096	7346	312	95.9258	4.07417
paired100	family	45	90	37	70.8661	29.1339	0.25	92.6981	7273	271	96.4077	3.59226
paired100	family	50	72	28	72	28		91.7048	7183	234	96.8451	3.15491
paired100	family	55	87	30	74.359	25.641	0.2	90.6249	7111	206	97.1846	2.81536
paired100	family	60	292	25	92.1136	7.88643	0.15	89.3596	7024	176	97.5556	2.44444
paired100	family	65	168	20	89.3617	10.6383		87.9305	6732	151	97.8062	2.19381
paired100	family	70	91	17	84.2593	15.7407		86.7668	6564	131	98.0433	1.95668
paired100	family	75	143	16	89.9371	10.0629	0.07,0.08,0.09,0.1	85.514	6473	114	98.2693	1.73068
paired100	family	80	163	8	95.3216	4.67836	0.06	83.8995	6330	98	98.4754	1.52458
paired100	family	85	261	14	94.9091	5.09091		81.9469	6167	90	98.5616	1.43839
paired100	family	90	546	42.5	92.7782	7.22175		78.7168	5906	76	98.7295	1.27048
paired100	family	95	2757.5	27.5	99.0126	0.987433	0.01,0.02,0.03,0.04,0.05	73.214	5360	33.5	99.3789	0.621118
paired100	family	100	2602.5	6	99.77	0.230017	0.001,0.005	45.7092	2602.5	6	99.77	0.230017
paired100	order	0	0	0	NA	NA	0.75	99.8861	8187.5	110	98.6743	1.3257
paired100	order	5	0	1	0	100		99.87	8187.5	110	98.6743	1.3257
paired100	order	10	0	2	0	100		99.7087	8187.5	109	98.6862	1.31381
paired100	order	15	0	7	0	100		99.2944	8187.5	107	98.71	1.29001
paired100	order	20	0	8	0	100		98.6484	8187.5	100	98.7934	1.20664
paired100	order	25	0	8	0	100	0.7	97.9417	8187.5	92	98.8888	1.11118
paired100	order	30	2	8	20	80	0.5,0.55,0.6,0.65	97.3632	8187.5	84	98.9845	1.01554
paired100	order	35	4	7	36.3636	63.6364	0.4,0.45	96.7397	8185.5	76	99.0801	0.91993
paired100	order	40	9	6	60	40	0.25,0.3,0.35	96.0812	8181.5	69	99.1637	0.836313
paired100	order	45	12	5	70.5882	29.4118	0.2	95.4102	8172.5	63	99.235	0.764981
paired100	order	50	10	4	71.4286	28.5714		94.8036	8160.5	58	99.2943	0.705725
paired100	order	55	12	6	66.6667	33.3333		94.1365	8150.5	54	99.3418	0.658175
paired100	order	60	20	5	80	20	0.1,0.15	93.4988	8138.5	48	99.4137	0.586331
paired100	order	65	27	4	87.0968	12.9032	0.08,0.09	92.8904	8118.5	43	99.4731	0.526864
paired100	order	70	32	6	84.2105	15.7895		92.2833	8091.5	39	99.5203	0.479675
paired100	order	75	50	3	94.3396	5.66038	0.04,0.05,0.06,0.07	91.5531	8059.5	33	99.5922	0.407785
paired100	order	80	80	5	94.1176	5.88235		90.6585	8009.5	30	99.6268	0.373158
paired100	order	85	145	10	93.5484	6.45161		89.4977	7929.5	25	99.6857	0.314288
paired100	order	90	258.5	3	98.8528	1.14723	0.005,0.01,0.02,0.03	88.0086	7784.5	15	99.8077	0.19232
paired100	order	95	2428.5	8	99.6717	0.32834		85.3711	7526	12	99.8408	0.159193
paired100	order	100	5097.5	4	99.9216	0.078408	0.001	65.3755	5097.5	4	99.9216	0.078408
paired100	class	0	0	0	NA	NA	0.55	100	8296	42.5	99.4903	0.509684
paired100	class	5	0	1	0	100		99.9915	8296	42.5	99.4903	0.509684
paired100	class	10	0	1.5	0	100		99.9099	8296	41.5	99.5022	0.497751
paired100	class	15	1	3	25	75		99.7056	8296	40	99.5202	0.479846
paired100	class	20	0	4	0	100		99.355	8295	37	99.5559	0.444071
paired100	class	25	0	4	0	100		98.7971	8295	33	99.6037	0.396254
paired100	class	30	0	4	0	100	0.5	98.3252	8295	29	99.6516	0.34839
paired100	class	35	3	2	60	40	0.15,0.2,0.25,0.3,0.35,0.4,0.45	97.8333	8295	25	99.6995	0.300481
paired100	class	40	4	2	66.6667	33.3333		97.3227	8292	23	99.7234	0.276609
paired100	class	45	5	2	71.4286	28.5714		96.8212	8288	21	99.7473	0.252738
paired100	class	50	5	3	62.5	37.5		96.3604	8283	19	99.7711	0.228861
paired100	class	55	6	1	85.7143	14.2857	0.02,0.03,0.04,0.05,0.06,0.07,0.08,0.09,0.1	95.8727	8278	16	99.8071	0.192911
paired100	class	60	8	0	100	0		95.3039	8272	15	99.819	0.181006
paired100	class	65	9	0	100	0		94.7811	8264	15	99.8188	0.181181
paired100	class	70	11	1	91.6667	8.33333		94.2606	8255	15	99.8186	0.181378
paired100	class	75	17	0	100	0		93.5754	8244	14	99.8305	0.169533
paired100	class	80	39	0	100	0		92.7771	8227	14	99.8301	0.169882
paired100	class	85	91	4	95.7895	4.21053		91.7576	8188	14	99.8293	0.17069
paired100	class	90	123	2	98.4	1.6	0.005,0.01	90.3057	8097	10	99.8766	0.12335
paired100	class	95	1595	5	99.6875	0.3125		87.9834	7974	8	99.8998	0.100226
paired100	class	100	6379	3	99.953	0.047007	0.001	70.8738	6379	3	99.953	0.047007
paired100	phylum	0	0	0	NA	NA	0.4	100	8354	21.5	99.7433	0.256701
paired100	phylum	5	0	0	NA	NA		99.9959	8354	21.5	99.7433	0.256701
paired100	phylum	10	0	0	NA	NA		99.9466	8354	21.5	99.7433	0.256701
paired100	phylum	15	0	3	0	100		99.8369	8354	21.5	99.7433	0.256701
paired100	phylum	20	0	1	0	100		99.6205	8354	18.5	99.779	0.220961
paired100	phylum	25	0	2.5	0	100		99.2723	8354	17.5	99.791	0.209043
paired100	phylum	30	1	2	33.3333	66.6667	0.25,0.3,0.35	98.919	8354	15	99.8208	0.179233
paired100	phylum	35	3	1	75	25		98.526	8353	13	99.8446	0.155391
paired100	phylum	40	2	3	40	60		98.1193	8350	12	99.8565	0.143506
paired100	phylum	45	2	3	40	60	0.2	97.6346	8348	9	99.8923	0.107694
paired100	phylum	50	2	1	66.6667	33.3333	0.08,0.09,0.1,0.15	97.2577	8346	6	99.9282	0.071839
paired100	phylum	55	4	2	66.6667	33.3333	0.07	96.8624	8344	5	99.9401	0.059887
paired100	phylum	60	4	0	100	0	0.001,0.005,0.01,0.02,0.03,0.04,0.05,0.06	96.3977	8340	3	99.964	0.035958
paired100	phylum	65	10	0	100	0		95.9927	8336	3	99.964	0.035976
paired100	phylum	70	8	0	100	0		95.5898	8326	3	99.964	0.036019
paired100	phylum	75	11	0	100	0		95.1291	8318	3	99.9639	0.036053
paired100	phylum	80	20	0	100	0		94.6214	8307	3	99.9639	0.036101
paired100	phylum	85	37	0	100	0		93.9167	8287	3	99.9638	0.036188
paired100	phylum	90	64	0	100	0		92.9022	8250	3	99.9637	0.03635
paired100	phylum	95	1000	2	99.8004	0.199601		90.9558	8186	3	99.9634	0.036635
paired100	phylum	100	7186	1	99.9861	0.013914		75.6028	7186	1	99.9861	0.013914
paired120	genus	0	0	2	0	100	0.9	99.4808	6528	1578	80.5329	19.4671
paired120	genus	5	0	26	0	100		98.8147	6528	1576	80.5528	19.4472
paired120	genus	10	10	39	20.4082	79.5918	0.75,0.8,0.85	96.7176	6528	1550	80.8121	19.1879
paired120	genus	15	22	55	28.5714	71.4286		94.5191	6518	1511	81.1807	18.8193
paired120	genus	20	52	109	32.2981	67.7019		92.8886	6496	1456	81.6901	18.3099
paired120	genus	25	53.5	165	24.4851	75.5149		91.1101	6444	1347	82.7108	17.2892
paired120	genus	30	61	103	37.1951	62.8049	0.6,0.65,0.7	89.2921	6390.5	1182	84.3909	15.6091
paired120	genus	35	59	103	36.4198	63.5802		87.466	6329.5	1079	85.4356	14.5644
paired120	genus	40	82	121	40.3941	59.6059	0.55	85.4941	6270.5	976	86.5314	13.4686
paired120	genus	45	135	131	50.7519	49.2481	0.45,0.5	83.7036	6188.5	855	87.8611	12.1389
paired120	genus	50	140	97	59.0717	40.9283	0.4	81.7973	6053.5	724	89.3176	10.6824
paired120	genus	55	136	88	60.7143	39.2857	0.35	79.8246	5913.5	627	90.4136	9.58642
paired120	genus	60	381	90	80.8917	19.1083	0.25,0.3	78.1084	5777.5	539	91.4668	8.53321
paired120	genus	65	206	73	73.8351	26.1649		75.6774	5396.5	449	92.3189	7.68112
paired120	genus	70	186	51	78.481	21.519	0.2	73.9995	5190.5	376	93.2453	6.75469
paired120	genus	75	259	66	79.6923	20.3077		72.465	5004.5	325	93.9019	6.09813
paired120	genus	80	257.5	57	81.876	18.124	0.15	70.3965	4745.5	259	94.8247	5.17534
paired120	genus	85	390	67	85.3392	14.6608		68.2973	4488	202	95.693	4.30704
paired120	genus	90	618.5	56	91.6976	8.30245	0.07,0.08,0.09,0.1	65.5569	4098	135	96.8108	3.18923
paired120	genus	95	2443.5	67	97.3312	2.66879	0.03,0.04,0.05,0.06	59.8138	3479.5	79	97.78	2.22004
paired120	genus	100	1036	12	98.855	1.14504	0.01,0.02	28.8117	1036	12	98.855	1.14504
paired120	family	0	0	1	0	100	0.7	99.744	7503	529.5	93.408	6.59197
paired120	family	5	0	7	0	100		99.5307	7503	528.5	93.4197	6.58034
paired120	family	10	4	10	28.5714	71.4286		97.9255	7503	521.5	93.5012	6.49885
paired120	family	15	6	15	28.5714	71.4286		96.5576	7499	511.5	93.6146	6.38537
paired120	family	20	8	24	25	75		95.6037	7493	496.5	93.7856	6.21441
paired120	family	25	9	38	19.1489	80.8511		94.5328	7485	472.5	94.0622	5.9378
paired120	family	30	36	74.5	32.5792	67.4208	0.6,0.65	93.6143	7476	434.5	94.5073	5.4927
paired120	family	35	94	48	66.1972	33.8028	0.3,0.35,0.4,0.45,0.5,0.55	92.5909	7440	360	95.3846	4.61538
paired120	family	40	73	41	64.0351	35.9649		91.5187	7346	312	95.9258	4.07417
paired120	family	45	90	37	70.8661	29.1339	0.25	90.492	7273	271	96.4077	3.59226
paired120	family	50	72	28	72	28		89.4333	7183	234	96.8451	3.15491
paired120	family	55	87	30	74.359	25.641	0.2	88.3612	7111	206	97.1846	2.81536
paired120	family	60	292	25	92.1136	7.88643	0.15	87.0568	7024	176	97.5556	2.44444
paired120	family	65	168	20	89.3617	10.6383		85.6844	6732	151	97.8062	2.19381
paired120	family	70	91	17	84.2593	15.7407		84.5668	6564	131	98.0433	1.95668
paired120	family	75	143	16	89.9371	10.0629	0.07,0.08,0.09,0.1	83.3812	6473	114	98.2693	1.73068
paired120	family	80	163	8	95.3216	4.67836	0.06	81.8606	6330	98	98.4754	1.52458
paired120	family	85	261	14	94.9091	5.09091		80.1067	6167	90	98.5616	1.43839
paired120	family	90	546	42.5	92.7782	7.22175		77.2466	5906	76	98.7295	1.27048
paired120	family	95	2757.5	27.5	99.0126	0.987433	0.01,0.02,0.03,0.04,0.05	72.0609	5360	33.5	99.3789	0.621118
paired120	family	100	2602.5	6	99.77	0.230017	0.001,0.005	46.3725	2602.5	6	99.77	0.230017
paired120	order	0	0	0	NA	NA	0.75	99.8677	8187.5	110	98.6743	1.3257
paired120	order	5	0	1	0	100		99.838	8187.5	110	98.6743	1.3257
paired120	order	10	0	2	0	100		99.5947	8187.5	109	98.6862	1.31381
paired120	order	15	0	7	0	100		98.5176	8187.5	107	98.71	1.29001
paired120	order	20	0	8	0	100		97.4485	8187.5	100	98.7934	1.20664
paired120	order	25	0	8	0	100	0.7	95.8973	8187.5	92	98.8888	1.11118
paired120	order	30	2	8	20	80	0.5,0.55,0.6,0.65	95.3163	8187.5	84	98.9845	1.01554
paired120	order	35	4	7	36.3636	63.6364	0.4,0.45	94.6873	8185.5	76	99.0801	0.91993
paired120	order	40	9	6	60	40	0.25,0.3,0.35	94.0479	8181.5	69	99.1637	0.836313
paired120	order	45	12	5	70.5882	29.4118	0.2	93.401	8172.5	63	99.235	0.764981
paired120	order	50	10	4	71.4286	28.5714		92.7743	8160.5	58	99.2943	0.705725
paired120	order	55	12	6	66.6667	33.3333		92.1127	8150.5	54	99.3418	0.658175
paired120	order	60	20	5	80	20	0.1,0.15	91.4595	8138.5	48	99.4137	0.586331
paired120	order	65	27	4	87.0968	12.9032	0.08,0.09	90.8222	8118.5	43	99.4731	0.526864
paired120	order	70	32	6	84.2105	15.7895		90.1018	8091.5	39	99.5203	0.479675
paired120	order	75	50	3	94.3396	5.66038	0.04,0.05,0.06,0.07	89.2877	8059.5	33	99.5922	0.407785
paired120	order	80	80	5	94.1176	5.88235		88.3731	8009.5	30	99.6268	0.373158
paired120	order	85	145	10	93.5484	6.45161		87.2603	7929.5	25	99.6857	0.314288
paired120	order	90	258.5	3	98.8528	1.14723	0.005,0.01,0.02,0.03	85.8671	7784.5	15	99.8077	0.19232
paired120	order	95	2428.5	8	99.6717	0.32834		83.3452	7526	12	99.8408	0.159193
paired120	order	100	5097.5	4	99.9216	0.078408	0.001	64.6612	5097.5	4	99.9216	0.078408
paired120	class	0	0	0	NA	NA	0.55	100	8296	42.5	99.4903	0.509684
paired120	class	5	0	1	0	100		99.9805	8296	42.5	99.4903	0.509684
paired120	class	10	0	1.5	0	100		99.8307	8296	41.5	99.5022	0.497751
paired120	class	15	1	3	25	75		99.0018	8296	40	99.5202	0.479846
paired120	class	20	0	4	0	100		98.6322	8295	37	99.5559	0.444071
paired120	class	25	0	4	0	100		98.0033	8295	33	99.6037	0.396254
paired120	class	30	0	4	0	100	0.5	97.5159	8295	29	99.6516	0.34839
paired120	class	35	3	2	60	40	0.15,0.2,0.25,0.3,0.35,0.4,0.45	97.0091	8295	25	99.6995	0.300481
paired120	class	40	4	2	66.6667	33.3333		96.449	8292	23	99.7234	0.276609
paired120	class	45	5	2	71.4286	28.5714		95.949	8288	21	99.7473	0.252738
paired120	class	50	5	3	62.5	37.5		94.7757	8283	19	99.7711	0.228861
paired120	class	55	6	1	85.7143	14.2857	0.02,0.03,0.04,0.05,0.06,0.07,0.08,0.09,0.1	93.876	8278	16	99.8071	0.192911
paired120	class	60	8	0	100	0		93.2852	8272	15	99.819	0.181006
paired120	class	65	9	0	100	0		92.7187	8264	15	99.8188	0.181181
paired120	class	70	11	1	91.6667	8.33333		92.1023	8255	15	99.8186	0.181378
paired120	class	75	17	0	100	0		91.3402	8244	14	99.8305	0.169533
paired120	class	80	39	0	100	0		90.5075	8227	14	99.8301	0.169882
paired120	class	85	91	4	95.7895	4.21053		89.5318	8188	14	99.8293	0.17069
paired120	class	90	123	2	98.4	1.6	0.005,0.01	88.1936	8097	10	99.8766	0.12335
paired120	class	95	1595	5	99.6875	0.3125		85.9978	7974	8	99.8998	0.100226
paired120	class	100	6379	3	99.953	0.047007	0.001	70.1692	6379	3	99.953	0.047007
paired120	phylum	0	0	0	NA	NA	0.4	100	8354	21.5	99.7433	0.256701
paired120	phylum	5	0	0	NA	NA		99.9875	8354	21.5	99.7433	0.256701
paired120	phylum	10	0	0	NA	NA		99.886	8354	21.5	99.7433	0.256701
paired120	phylum	15	0	3	0	100		99.1798	8354	21.5	99.7433	0.256701
paired120	phylum	20	0	1	0	100		98.9485	8354	18.5	99.779	0.220961
paired120	phylum	25	0	2.5	0	100		98.4962	8354	17.5	99.791	0.209043
paired120	phylum	30	1	2	33.3333	66.6667	0.25,0.3,0.35	98.1425	8354	15	99.8208	0.179233
paired120	phylum	35	3	1	75	25		97.7664	8353	13	99.8446	0.155391
paired120	phylum	40	2	3	40	60		97.3631	8350	12	99.8565	0.143506
paired120	phylum	45	2	3	40	60	0.2	96.9214	8348	9	99.8923	0.107694
paired120	phylum	50	2	1	66.6667	33.3333	0.08,0.09,0.1,0.15	96.5174	8346	6	99.9282	0.071839
paired120	phylum	55	4	2	66.6667	33.3333	0.07	96.0621	8344	5	99.9401	0.059887
paired120	phylum	60	4	0	100	0	0.001,0.005,0.01,0.02,0.03,0.04,0.05,0.06	95.4315	8340	3	99.964	0.035958
paired120	phylum	65	10	0	100	0		94.0544	8336	3	99.964	0.035976
paired120	phylum	70	8	0	100	0		93.5789	8326	3	99.964	0.036019
paired120	phylum	75	11	0	100	0		93.0678	8318	3	99.9639	0.036053
paired120	phylum	80	20	0	100	0		92.4153	8307	3	99.9639	0.036101
paired120	phylum	85	37	0	100	0		91.6686	8287	3	99.9638	0.036188
paired120	phylum	90	64	0	100	0		90.7493	8250	3	99.9637	0.03635
paired120	phylum	95	1000	2	99.8004	0.199601		88.9534	8186	3	99.9634	0.036635
paired120	phylum	100	7186	1	99.9861	0.013914		74.6494	7186	1	99.9861	0.013914
