# Supplementary material for: Taxonomic Classification of Bacterial 16S rRNA Genes Using Short Sequencing Reads: Evaluation of Effective Study Designs
Source: PLoS One. 2013 Jan 7;8(1):e53608. doi: 10.1371/journal.pone.0053608 (PMC3538547; doi:10.1371/journal.pone.0053608)
Supplement: Table S10 — Summary of analyses for V9. For each sequencing configuration, taxonomic rank and bootstrap confidence value C, we provide the following information pertaining to the interval [C.C+4] (except for the case C = 100, in which the interval is of size 1): Interval_TP - median number of true predictions in leave-k-out tests (out of 100 repeats); Interval_FP - median number of false predictions in leave-k-out tests (out of 100 repeats); Interval_precision - precision in leave-k-out tests (%), calculated from Interval_TP and Interval_FP; Interval_FPR - false prediction rate in leave-k-out tests (%), calculated from Interval_TP and Interval_FP; threshold for FPR – FPR values for which the confidence value is suitable as a threshold (note that not all rows will contain this field, as we tested only a limited set of FPR values), each threshold is the median of 100 thresholds obtained for the same desired FPR from 100 repeats of the leave-k-out test. We also provide the following information for the interval [C.100]: Env_coverage - coverage of environmental sequences (%); Cumulative_TP - number of true predictions in leave-k-out tests, calculated from Interval_TP; Cumulative_FP - number of false predictions in leave-k-out tests, calculated from Interval_FP; Cumulative_precision – precision of leave-k-out tests (%), calculated from Cumulative_TP and Cumulative_FP; Cumulative_FPR – false prediction rate of leave-k-out tests (%), calculated from Cumulative_TP and Cumulative_FP. (XLS) [file pone.0053608.s016.xls]

## Sheet: Sheet1
Table S10. Summary of analyses for V9, for all experimental designs examined.
The table contains the following columns: • Sequencing_configuration • Rank • Confidence (the value of this column is referred to as ‘C’ in the description of subsequent columns) • Columns pertaining to the interval [C..C+4] (except for the case C=100, in which the interval is of size 1): o Interval_TP – median number of true predictions in leave-k-out tests (out of 100 repeats) o Interval_FP – m…
Sequencing_configuration	Rank	Confidence	Interval_TP	Interval_FP	Interval_precision	Interval_FPR	threshold for FPR	Env_coverage	Cumulative_TP	Cumulative_FP	Cumulative_precision	Cumulative_FPR
single100	genus	0	0	12	0	100	0.85	99.1719	3652.5	1798	67.0122	32.9878
single100	genus	5	5	23	17.8571	82.1429		97.8941	3652.5	1786	67.1601	32.8399
single100	genus	10	11	43	20.3704	79.6296		95.4629	3647.5	1763	67.4152	32.5848
single100	genus	15	24	76	24	76		92.0455	3636.5	1720	67.8895	32.1105
single100	genus	20	29	165	14.9485	85.0515		85.9757	3612.5	1644	68.7244	31.2756
single100	genus	25	44	94	31.8841	68.1159	0.65,0.7,0.75,0.8	76.9476	3583.5	1479	70.7852	29.2148
single100	genus	30	51	106	32.4841	67.5159		69.9581	3539.5	1385	71.8753	28.1247
single100	genus	35	72	105.5	40.5634	59.4366	0.6	64.6476	3488.5	1279	73.1725	26.8275
single100	genus	40	84	157	34.8548	65.1452		60.5139	3416.5	1173.5	74.4336	25.5664
single100	genus	45	84	134.5	38.4439	61.5561		56.5023	3332.5	1016.5	76.6268	23.3732
single100	genus	50	140	158	46.9799	53.0201	0.5,0.55	52.353	3248.5	882	78.6467	21.3533
single100	genus	55	133	102	56.5957	43.4043	0.4,0.45	48.2765	3108.5	724	81.1089	18.8911
single100	genus	60	163.5	101	61.8147	38.1853	0.35	43.787	2975.5	622	82.7102	17.2898
single100	genus	65	168	92	64.6154	35.3846		40.0734	2812	521	84.3684	15.6316
single100	genus	70	203	118.5	63.1415	36.8585		36.954	2644	429	86.0397	13.9603
single100	genus	75	201	68	74.7212	25.2788	0.25,0.3	32.9173	2441	310.5	88.7152	11.2848
single100	genus	80	243	64	79.1531	20.8469	0.2	30.0865	2240	242.5	90.2316	9.76838
single100	genus	85	498	74	87.0629	12.9371	0.15	26.6129	1997	178.5	91.795	8.20501
single100	genus	90	421.5	66.5	86.373	13.627		21.9076	1499	104.5	93.483	6.51699
single100	genus	95	861.5	35	96.0959	3.90407	0.03,0.04,0.05,0.06,0.07,0.08,0.09,0.1	16.7112	1077.5	38	96.5935	3.40654
single100	genus	100	216	3	98.6301	1.36986	0.005,0.01,0.02	2.5196	216	3	98.6301	1.36986
single100	family	0	0	2	0	100	0.7	99.8577	4672	731.5	86.4625	13.5375
single100	family	5	0	8	0	100		99.4654	4672	729.5	86.4945	13.5055
single100	family	10	3	15	16.6667	83.3333	0.65	98.4174	4672	721.5	86.6228	13.3772
single100	family	15	6	18	25	75	0.6	96.8493	4669	706.5	86.857	13.143
single100	family	20	14	32.5	30.1075	69.8925		94.0425	4663	688.5	87.1344	12.8656
single100	family	25	15	24	38.4615	61.5385		90.3005	4649	656	87.6343	12.3657
single100	family	30	21	42	33.3333	66.6667		87.1193	4634	632	87.9985	12.0015
single100	family	35	42	37	53.1646	46.8354	0.5,0.55	83.2841	4613	590	88.6604	11.3396
single100	family	40	63	80	44.0559	55.9441		80.0918	4571	553	89.2077	10.7924
single100	family	45	59.5	62	48.9712	51.0288	0.45	77.2546	4508	473	90.5039	9.49609
single100	family	50	77	61	55.7971	44.2029	0.4	74.7266	4448.5	411	91.5423	8.45766
single100	family	55	87	51	63.0435	36.9565	0.3,0.35	72.2333	4371.5	350	92.5871	7.4129
single100	family	60	123	44	73.6527	26.3473	0.25	69.7095	4284.5	299	93.4766	6.5234
single100	family	65	124	23	84.3537	15.6463	0.15,0.2	67.162	4161.5	255	94.2262	5.7738
single100	family	70	145	25	85.2941	14.7059		64.5899	4037.5	232	94.5661	5.43389
single100	family	75	165	21	88.7097	11.2903		61.5417	3892.5	207	94.9506	5.0494
single100	family	80	276.5	46	85.7364	14.2636		57.8802	3727.5	186	95.2472	4.75278
single100	family	85	486	33	93.6416	6.35838	0.08,0.09,0.1	51.167	3451	140	96.1014	3.89864
single100	family	90	720	68	91.3706	8.62944		45.6247	2965	107	96.5169	3.48307
single100	family	95	1756.5	38	97.8824	2.11758	0.02,0.03,0.04,0.05,0.06,0.07	37.5213	2245	39	98.2925	1.70753
single100	family	100	488.5	1	99.7957	0.20429	0.001,0.005,0.01	7.0241	488.5	1	99.7957	0.20429
single100	order	0	0	0	NA	NA	0.8	99.9967	5307.5	274	95.0909	4.90907
single100	order	5	0	2	0	100		99.8268	5307.5	274	95.0909	4.90907
single100	order	10	0	8	0	100		99.2169	5307.5	272	95.125	4.87499
single100	order	15	3	7	30	70		98.1268	5307.5	264	95.2616	4.7384
single100	order	20	6	6	50	50		96.2443	5304.5	257	95.3789	4.62106
single100	order	25	5	11	31.25	68.75		93.8407	5298.5	251	95.4771	4.52293
single100	order	30	9	10	47.3684	52.6316		91.2764	5293.5	240	95.6628	4.33722
single100	order	35	9	15	37.5	62.5		88.8627	5284.5	230	95.8292	4.17082
single100	order	40	6	46	11.5385	88.4615		86.1193	5275.5	215	96.0841	3.91586
single100	order	45	13	30	30.2326	69.7674	0.6,0.65,0.7,0.75	83.5115	5269.5	169	96.8925	3.10747
single100	order	50	20	9	68.9655	31.0345	0.2,0.25,0.3,0.35,0.4,0.45,0.5,0.55	81.2819	5256.5	139	97.4238	2.57622
single100	order	55	28	8	77.7778	22.2222	0.15	79.2137	5236.5	130	97.5776	2.42244
single100	order	60	44.5	11	80.1802	19.8198		77.1815	5208.5	122	97.7113	2.28872
single100	order	65	53	5	91.3793	8.62069		75.0732	5164	111	97.8957	2.10426
single100	order	70	91	11	89.2157	10.7843		72.6787	5111	106	97.9682	2.03182
single100	order	75	99	10	90.8257	9.17431		70.1663	5020	95	98.1427	1.85728
single100	order	80	151	30	83.4254	16.5746		66.9637	4921	85	98.302	1.69796
single100	order	85	218.5	13	94.3844	5.61555	0.04,0.05,0.06,0.07,0.08,0.09,0.1	61.6368	4770	55	98.8601	1.1399
single100	order	90	325	12	96.4392	3.56083	0.03	56.5609	4551.5	42	99.0857	0.914335
single100	order	95	2233.5	29	98.7182	1.28177	0.01,0.02	49.498	4226.5	30	99.2952	0.704804
single100	order	100	1993	1	99.9498	0.05015	0.001,0.005	11.8527	1993	1	99.9498	0.05015
single100	class	0	0	0	NA	NA	0.4	99.9977	5573	30.5	99.4557	0.544303
single100	class	5	0	0	NA	NA		99.9155	5573	30.5	99.4557	0.544303
single100	class	10	0	3	0	100		99.6025	5573	30.5	99.4557	0.544303
single100	class	15	1	0	100	0	0.35	99.0165	5573	27.5	99.509	0.491028
single100	class	20	1	3	25	75		97.8171	5572	27.5	99.5089	0.491115
single100	class	25	2	4	33.3333	66.6667		96.232	5571	24.5	99.5621	0.437852
single100	class	30	2	3.5	36.3636	63.6364	0.25,0.3	94.7306	5569	20.5	99.6332	0.366759
single100	class	35	2	2	50	50	0.15,0.2	93.0837	5567	17	99.6956	0.304441
single100	class	40	2	2	50	50	0.08,0.09,0.1	91.3179	5565	15	99.7312	0.268817
single100	class	45	4	1	80	20	0.05,0.06,0.07	89.2743	5563	13	99.7669	0.233142
single100	class	50	6	1	85.7143	14.2857		87.6735	5559	12	99.7846	0.215401
single100	class	55	16	2	88.8889	11.1111	0.03,0.04	86.0015	5553	11	99.8023	0.197699
single100	class	60	19	1	95	5	0.02	84.659	5537	9	99.8377	0.162279
single100	class	65	19	0	100	0		83.2577	5518	8	99.8552	0.14477
single100	class	70	30	2	93.75	6.25		81.4387	5499	8	99.8547	0.14527
single100	class	75	42	0	100	0	0.005,0.01	79.3027	5469	6	99.8904	0.109589
single100	class	80	44	1	97.7778	2.22222		77.1074	5427	6	99.8896	0.110436
single100	class	85	73.5	0	100	0	0.001	74.3987	5383	5	99.9072	0.092799
single100	class	90	152.5	1	99.3485	0.651466		71.0963	5309.5	5	99.9059	0.094082
single100	class	95	1958.5	4	99.7962	0.203822		65.3387	5157	4	99.9225	0.077504
single100	class	100	3198.5	0	100	0		27.0855	3198.5	0	100	0
single100	phylum	0	0	0	NA	NA	0.35	100	5609.5	13.5	99.7599	0.240085
single100	phylum	5	0	0	NA	NA		99.9697	5609.5	13.5	99.7599	0.240085
single100	phylum	10	0	0	NA	NA		99.8383	5609.5	13.5	99.7599	0.240085
single100	phylum	15	1	0	100	0		99.6246	5609.5	13.5	99.7599	0.240085
single100	phylum	20	1	3	25	75		99.2235	5608.5	13.5	99.7599	0.240128
single100	phylum	25	1	2.5	28.5714	71.4286		98.6063	5607.5	10.5	99.8131	0.186899
single100	phylum	30	1	3	25	75	0.25,0.3	97.8157	5606.5	8	99.8575	0.142488
single100	phylum	35	2	2	50	50	0.1,0.15,0.2	96.9319	5605.5	5	99.9109	0.089119
single100	phylum	40	2	1	66.6667	33.3333	0.05,0.06,0.07,0.08,0.09	95.9804	5603.5	3	99.9465	0.053509
single100	phylum	45	1	1	50	50	0.03,0.04	94.767	5601.5	2	99.9643	0.035692
single100	phylum	50	4	0	100	0	0.001,0.005,0.01,0.02	93.3057	5600.5	1	99.9821	0.017852
single100	phylum	55	4	0	100	0		91.9212	5596.5	1	99.9821	0.017865
single100	phylum	60	9	0	100	0		90.69	5592.5	1	99.9821	0.017878
single100	phylum	65	6	0	100	0		89.2037	5583.5	1	99.9821	0.017907
single100	phylum	70	13	0	100	0		87.9662	5577.5	1	99.9821	0.017926
single100	phylum	75	18	0	100	0		86.431	5564.5	1	99.982	0.017968
single100	phylum	80	22	0	100	0		84.333	5546.5	1	99.982	0.018026
single100	phylum	85	43	0	100	0		82.3438	5524.5	1	99.9819	0.018098
single100	phylum	90	78	0	100	0		79.854	5481.5	1	99.9818	0.01824
single100	phylum	95	1009	1	99.901	0.09901		75.7217	5403.5	1	99.9815	0.018503
single100	phylum	100	4394.5	0	100	0		50.4011	4394.5	0	100	0
single120	genus	0	0	8	0	100	0.75	99.341	3735	1716.5	68.5133	31.4867
single120	genus	5	9	25	26.4706	73.5294	0.7	97.6595	3735	1708.5	68.6139	31.3861
single120	genus	10	15	37	28.8462	71.1538		95.2566	3726	1683.5	68.8788	31.1212
single120	genus	15	12	44	21.4286	78.5714		91.8334	3711	1646.5	69.2674	30.7326
single120	genus	20	25	76	24.7525	75.2475		87.0767	3699	1602.5	69.7727	30.2273
single120	genus	25	60	140	30	70		79.6379	3674	1526.5	70.6471	29.3529
single120	genus	30	59	157	27.3148	72.6852		72.3414	3614	1386.5	72.2728	27.7272
single120	genus	35	58	125	31.694	68.306	0.65	66.1205	3555	1229.5	74.3024	25.6976
single120	genus	40	88.5	123	41.844	58.156	0.55,0.6	61.8352	3497	1104.5	75.997	24.003
single120	genus	45	63	94	40.1274	59.8726		57.9422	3408.5	981.5	77.6424	22.3576
single120	genus	50	109.5	96	53.2847	46.7153	0.5	54.2361	3345.5	887.5	79.0338	20.9662
single120	genus	55	139.5	145	49.0334	50.9666		50.5746	3236	791.5	80.3476	19.6524
single120	genus	60	170	104.5	61.9308	38.0692	0.35,0.4,0.45	46.0156	3096.5	646.5	82.7278	17.2722
single120	genus	65	166	81	67.2065	32.7935	0.3	41.7029	2926.5	542	84.3736	15.6264
single120	genus	70	196	95	67.354	32.646		38.4197	2760.5	461	85.6899	14.3101
single120	genus	75	206.5	95	68.4909	31.5091		34.7214	2564.5	366	87.5107	12.4893
single120	genus	80	251	97	72.1264	27.8736	0.25	31.2443	2358	271	89.6919	10.3081
single120	genus	85	344	58	85.5721	14.4279	0.15,0.2	27.6719	2107	174	92.3718	7.62823
single120	genus	90	530	70	88.3333	11.6667	0.1	23.571	1763	116	93.8265	6.1735
single120	genus	95	967	44	95.6479	4.35213	0.04,0.05,0.06,0.07,0.08,0.09	17.8872	1233	46	96.4034	3.59656
single120	genus	100	266	2	99.2537	0.746269	0.005,0.01,0.02,0.03	3.2246	266	2	99.2537	0.746269
single120	family	0	0	1	0	100	0.75	99.9018	4761.5	644	88.0862	11.9138
single120	family	5	0	8	0	100		99.4515	4761.5	643	88.1025	11.8975
single120	family	10	4	22	15.3846	84.6154	0.7	98.4019	4761.5	635	88.2331	11.7669
single120	family	15	6	17	26.087	73.913	0.65	96.5372	4757.5	613	88.5858	11.4142
single120	family	20	5	19.5	20.4082	79.5918		93.9877	4751.5	596	88.8546	11.1454
single120	family	25	19	21	47.5	52.5	0.5,0.55,0.6	90.75	4746.5	576.5	89.1696	10.8304
single120	family	30	50	33	60.241	39.759		87.531	4727.5	555.5	89.4851	10.5149
single120	family	35	42	58	42	58		84.1046	4677.5	522.5	89.9519	10.0481
single120	family	40	49	40	55.0562	44.9438	0.4,0.45	80.8221	4635.5	464.5	90.8922	9.10784
single120	family	45	60	29	67.4157	32.5843	0.35	78.491	4586.5	424.5	91.5286	8.47136
single120	family	50	67	35	65.6863	34.3137		76.0625	4526.5	395.5	91.9646	8.03535
single120	family	55	86	54	61.4286	38.5714		73.579	4459.5	360.5	92.5207	7.47925
single120	family	60	115	45	71.875	28.125	0.25,0.3	71.2479	4373.5	306.5	93.4509	6.54915
single120	family	65	128	30	81.0127	18.9873	0.15,0.2	68.4783	4258.5	261.5	94.2146	5.7854
single120	family	70	140	17	89.172	10.828		65.8865	4130.5	231.5	94.6928	5.3072
single120	family	75	158.5	28	84.9866	15.0134		63.1965	3990.5	214.5	94.8989	5.10107
single120	family	80	258	41	86.2876	13.7124		57.9816	3832	186.5	95.359	4.64103
single120	family	85	326	41.5	88.7075	11.2925	0.09,0.1	53.9618	3574	145.5	96.0882	3.91182
single120	family	90	781	60	92.8656	7.13436	0.06,0.07,0.08	47.9816	3248	104	96.8974	3.10263
single120	family	95	1900	42	97.8373	2.16272	0.02,0.03,0.04,0.05	40.6548	2467	44	98.2477	1.75229
single120	family	100	567	2	99.6485	0.351494	0.001,0.005,0.01	8.153	567	2	99.6485	0.351494
single120	order	0	0	0	NA	NA	0.6	99.9967	5354	224	95.9842	4.01578
single120	order	5	0	3	0	100		99.8372	5354	224	95.9842	4.01578
single120	order	10	0	5	0	100		99.2384	5354	221	96.0359	3.96413
single120	order	15	3	9	25	75	0.55	98.2588	5354	216	96.1221	3.87792
single120	order	20	2	4	33.3333	66.6667		96.5317	5351	207	96.2756	3.72436
single120	order	25	5	7	41.6667	58.3333		94.2293	5349	203	96.3437	3.65634
single120	order	30	33	10	76.7442	23.2558		91.6981	5344	196	96.4621	3.53791
single120	order	35	7	16	30.4348	69.5652		88.9113	5311	186	96.6163	3.38366
single120	order	40	7	16	30.4348	69.5652		86.9111	5304	170	96.8944	3.10559
single120	order	45	9	13	40.9091	59.0909	0.4,0.45,0.5	84.8626	5297	154	97.1748	2.82517
single120	order	50	23	9	71.875	28.125	0.2,0.25,0.3,0.35	82.4366	5288	141	97.4028	2.59716
single120	order	55	27	9	75	25		80.1959	5265	132	97.5542	2.4458
single120	order	60	31	11	73.8095	26.1905	0.15	78.2969	5238	123	97.7057	2.29435
single120	order	65	45	8	84.9057	15.0943		76.2959	5207	112	97.8943	2.10566
single120	order	70	69	10	87.3418	12.6582		74.2941	5162	104	98.0251	1.97493
single120	order	75	80	8	90.9091	9.09091		71.7754	5093	94	98.1878	1.81222
single120	order	80	147	26	84.9711	15.0289		67.0377	5013	86	98.3134	1.6866
single120	order	85	209	17	92.4779	7.52212	0.05,0.06,0.07,0.08,0.09,0.1	63.3415	4866	60	98.782	1.21803
single120	order	90	294.5	10	96.7159	3.28407	0.02,0.03,0.04	58.6172	4657	43	99.0851	0.914894
single120	order	95	2238	31	98.6338	1.36624	0.01	51.9437	4362.5	33	99.2492	0.750768
single120	order	100	2124.5	2	99.9059	0.094051	0.001,0.005	14.0225	2124.5	2	99.9059	0.094051
single120	class	0	0	0	NA	NA	0.4	99.9977	5575	28	99.5003	0.499732
single120	class	5	0	2	0	100		99.925	5575	28	99.5003	0.499732
single120	class	10	0	3	0	100		99.672	5575	26	99.5358	0.464203
single120	class	15	1	1	50	50		99.1558	5575	23	99.5891	0.410861
single120	class	20	0	1	0	100		98.0499	5574	22	99.6069	0.393138
single120	class	25	0	2	0	100	0.35	96.5427	5574	21	99.6247	0.375335
single120	class	30	0	2	0	100		95.1979	5574	19	99.6603	0.33971
single120	class	35	1	2	33.3333	66.6667	0.25,0.3	93.7031	5574	17	99.6959	0.30406
single120	class	40	4.5	2	69.2308	30.7692	0.08,0.09,0.1,0.15,0.2	92.2458	5573	15	99.7316	0.268432
single120	class	45	4	1	80	20	0.07	90.5207	5568.5	13	99.7671	0.232912
single120	class	50	8	1	88.8889	11.1111	0.05,0.06	88.6159	5564.5	12	99.7848	0.215189
single120	class	55	8	2	80	20		86.8002	5556.5	11	99.8024	0.197575
single120	class	60	11	1	91.6667	8.33333	0.02,0.03,0.04	85.3468	5548.5	9	99.8381	0.161943
single120	class	65	13	0	100	0		83.8434	5537.5	8	99.8557	0.144261
single120	class	70	28	1	96.5517	3.44828		82.2143	5524.5	8	99.8554	0.1446
single120	class	75	30	2	93.75	6.25		80.5938	5496.5	7	99.8728	0.127192
single120	class	80	49	0	100	0	0.001,0.005,0.01	78.3322	5466.5	5	99.9086	0.091383
single120	class	85	59	0	100	0		75.3692	5417.5	5	99.9078	0.092208
single120	class	90	127	0	100	0		71.4745	5358.5	5	99.9068	0.093223
single120	class	95	1730.5	4	99.7694	0.230614		66.7653	5231.5	5	99.9045	0.095484
single120	class	100	3501	1	99.9714	0.028555		31.7477	3501	1	99.9714	0.028555
single120	phylum	0	0	0	NA	NA	0.4	100	5608	13.5	99.7599	0.240149
single120	phylum	5	0	1	0	100		99.9681	5608	13.5	99.7599	0.240149
single120	phylum	10	0	0	NA	NA		99.8795	5608	12.5	99.7776	0.2224
single120	phylum	15	1	1	50	50		99.6759	5608	12.5	99.7776	0.2224
single120	phylum	20	0	1	0	100		99.2748	5607	11.5	99.7953	0.204681
single120	phylum	25	0	3	0	100		98.6608	5607	10.5	99.8131	0.186916
single120	phylum	30	0	2	0	100		97.9014	5607	7.5	99.8664	0.133583
single120	phylum	35	0	2	0	100	0.25,0.3,0.35	97.0806	5607	5.5	99.902	0.097996
single120	phylum	40	1.5	1	60	40	0.1,0.15,0.2	96.1238	5607	3.5	99.9376	0.062383
single120	phylum	45	1	1.5	40	60	0.08,0.09	95.0862	5605.5	2.5	99.9554	0.044579
single120	phylum	50	2	0	100	0	0.02,0.03,0.04,0.05,0.06,0.07	93.7539	5604.5	1	99.9822	0.01784
single120	phylum	55	4	0	100	0	0.001,0.005,0.01	92.4404	5602.5	1	99.9822	0.017846
single120	phylum	60	6	0	100	0		91.2659	5598.5	1	99.9821	0.017859
single120	phylum	65	5	0	100	0		90.041	5592.5	1	99.9821	0.017878
single120	phylum	70	10	0	100	0		88.5984	5587.5	1	99.9821	0.017894
single120	phylum	75	14	0	100	0		87.2156	5577.5	1	99.9821	0.017926
single120	phylum	80	22	0	100	0		85.0385	5563.5	1	99.982	0.017971
single120	phylum	85	33	0	100	0		83.0713	5541.5	1	99.982	0.018042
single120	phylum	90	73	0	100	0		80.647	5508.5	1	99.9818	0.01815
single120	phylum	95	942	1	99.894	0.106045		76.4817	5435.5	1	99.9816	0.018394
single120	phylum	100	4493.5	0	100	0		51.408	4493.5	0	100	0
paired100	genus	0	0	1	0	100	0.9	99.4151	4472.5	977	82.0717	17.9282
paired100	genus	5	0	9	0	100		99.0492	4472.5	976	82.0868	17.9132
paired100	genus	10	1	18	5.26316	94.7368		97.3322	4472.5	967	82.2226	17.7774
paired100	genus	15	0	29	0	100		94.092	4471.5	949	82.4924	17.5076
paired100	genus	20	8	31	20.5128	79.4872	0.7,0.75,0.8,0.85	90.0074	4471.5	920	82.9361	17.0639
paired100	genus	25	16	43.5	26.8908	73.1092	0.65	85.6101	4463.5	889	83.3909	16.6091
paired100	genus	30	27	51	34.6154	65.3846	0.6	81.3269	4447.5	845.5	84.0261	15.9739
paired100	genus	35	31	61	33.6957	66.3043		76.9452	4420.5	794.5	84.7651	15.2349
paired100	genus	40	37.5	69.5	35.0467	64.9533		70.9418	4389.5	733.5	85.6822	14.3178
paired100	genus	45	56	75	42.7481	57.2519	0.55	66.5695	4352	664	86.7624	13.2376
paired100	genus	50	81	69	54	46	0.4,0.45,0.5	62.8711	4296	589	87.9427	12.0573
paired100	genus	55	96	69	58.1818	41.8182		59.6028	4215	520	89.018	10.982
paired100	genus	60	91	55	62.3288	37.6712		55.7457	4119	451	90.1313	9.86871
paired100	genus	65	99	71	58.2353	41.7647		52.7261	4028	396	91.0488	8.95117
paired100	genus	70	110	45	70.9677	29.0323	0.25,0.3,0.35	49.2224	3929	325	92.3601	7.63987
paired100	genus	75	145	47	75.5208	24.4792	0.2	46.087	3819	280	93.1691	6.83093
paired100	genus	80	187	43	81.3043	18.6957	0.15	43.2112	3674	233	94.0363	5.96366
paired100	genus	85	247	38	86.6667	13.3333		40.6904	3487	190	94.8327	5.16726
paired100	genus	90	435	54	88.9571	11.0429	0.09,0.1	37.4753	3240	152	95.5189	4.48113
paired100	genus	95	1785	86	95.4035	4.59647	0.04,0.05,0.06,0.07,0.08	32.3899	2805	98	96.6242	3.37582
paired100	genus	100	1020	12	98.8372	1.16279	0.01,0.02,0.03	13.0466	1020	12	98.8372	1.16279
paired100	family	0	0	0	NA	NA	0.7	99.7803	5191	205.5	96.192	3.80802
paired100	family	5	0	2	0	100		99.6854	5191	205.5	96.192	3.80802
paired100	family	10	0	3	0	100		99.0535	5191	203.5	96.2276	3.77236
paired100	family	15	1	7	12.5	87.5		97.4091	5191	200.5	96.2812	3.71882
paired100	family	20	1	10	9.09091	90.9091	0.65	94.8614	5190	193.5	96.4057	3.59432
paired100	family	25	2	10	16.6667	83.3333	0.6	91.5538	5189	183.5	96.5845	3.41554
paired100	family	30	7	16	30.4348	69.5652	0.55	89.0044	5187	173.5	96.7634	3.23664
paired100	family	35	19	17	52.7778	47.2222	0.35,0.4,0.45,0.5	86.6883	5180	157.5	97.0492	2.95082
paired100	family	40	17	13	56.6667	43.3333	0.3	84.2653	5161	140.5	97.3498	2.65019
paired100	family	45	22	8	73.3333	26.6667	0.2,0.25	82.0806	5144	127.5	97.5813	2.41867
paired100	family	50	44	12	78.5714	21.4286		79.9442	5122	119.5	97.7201	2.27988
paired100	family	55	48	12	80	20		77.9902	5078	107.5	97.9269	2.07309
paired100	family	60	34	11.5	74.7253	25.2747		76.1422	5030	95.5	98.1368	1.86323
paired100	family	65	42	12	77.7778	22.2222	0.15	74.1271	4996	84	98.3465	1.65354
paired100	family	70	54	12	81.8182	18.1818		72.0433	4954	72	98.5674	1.43255
paired100	family	75	91	7	92.8571	7.14286	0.04,0.05,0.06,0.07,0.08,0.09,0.1	69.8603	4900	60	98.7903	1.20968
paired100	family	80	114	6	95	5	0.03	67.7426	4809	53	98.9099	1.09009
paired100	family	85	175	8	95.6284	4.37158		65.4002	4695	47	99.0089	0.991143
paired100	family	90	305.5	13	95.9184	4.08163		62.04	4520	39	99.1445	0.855451
paired100	family	95	2079	19	99.0944	0.905624	0.01,0.02	57.5756	4214.5	26	99.3869	0.613135
paired100	family	100	2135.5	7	99.6733	0.326721	0.005	30.3364	2135.5	7	99.6733	0.326721
paired100	order	0	0	0	NA	NA	0.7	99.9942	5519.5	61	98.9069	1.09309
paired100	order	5	0	0	NA	NA		99.9658	5519.5	61	98.9069	1.09309
paired100	order	10	1	2	33.3333	66.6667		99.7035	5519.5	61	98.9069	1.09309
paired100	order	15	1	3	25	75		98.904	5518.5	59	98.9422	1.05782
paired100	order	20	0	7	0	100		97.25	5517.5	56	98.9952	1.00476
paired100	order	25	0	4	0	100	0.55,0.6,0.65	95.4482	5517.5	49	99.1197	0.880266
paired100	order	30	3	2	60	40	0.5	93.6204	5517.5	45	99.191	0.808989
paired100	order	35	3	3	50	50		91.9113	5514.5	43	99.2263	0.773729
paired100	order	40	1	6	14.2857	85.7143		89.9532	5511.5	40	99.2795	0.720526
paired100	order	45	3	4	42.8571	57.1429	0.2,0.25,0.3,0.35,0.4,0.45	88.2959	5510.5	34	99.3868	0.61322
paired100	order	50	6	3	66.6667	33.3333	0.15	86.748	5507.5	30	99.4582	0.541761
paired100	order	55	8	3	72.7273	27.2727		85.0856	5501.5	27	99.5116	0.488378
paired100	order	60	10	2	83.3333	16.6667	0.1	83.3924	5493.5	24	99.565	0.43498
paired100	order	65	11	3	78.5714	21.4286	0.09	81.5504	5483.5	22	99.6004	0.3996
paired100	order	70	17.5	3	85.3659	14.6341	0.06,0.07,0.08	79.7026	5472.5	19	99.654	0.345989
paired100	order	75	22	3	88	12	0.04,0.05	77.6476	5455	16	99.7075	0.292451
paired100	order	80	38	0	100	0	0.005,0.01,0.02,0.03	75.7472	5433	13	99.7613	0.238707
paired100	order	85	81	1	98.7805	1.21951		73.5377	5395	13	99.7596	0.240385
paired100	order	90	141	0	100	0		70.2239	5314	12	99.7747	0.22531
paired100	order	95	1455	5	99.6575	0.342466		66.4406	5173	12	99.7686	0.231437
paired100	order	100	3718	7	99.8121	0.187919	0.001	39.523	3718	7	99.8121	0.187919
paired100	class	0	0	0	NA	NA	0.55	99.9969	5581	22	99.6074	0.392647
paired100	class	5	0	0	NA	NA		99.9914	5581	22	99.6074	0.392647
paired100	class	10	0	1	0	100		99.8881	5581	22	99.6074	0.392647
paired100	class	15	0	2	0	100		99.4202	5581	21	99.6251	0.374866
paired100	class	20	0	5	0	100		98.4899	5581	19	99.6607	0.339286
paired100	class	25	1	1	50	50	0.35,0.4,0.45,0.5	97.199	5581	14	99.7498	0.250223
paired100	class	30	0	1	0	100		95.782	5580	13	99.7676	0.232433
paired100	class	35	1	1	50	50	0.3	94.2618	5580	12	99.7854	0.214592
paired100	class	40	1	3	25	75		92.7244	5579	11	99.8032	0.19678
paired100	class	45	4	1	80	20	0.02,0.03,0.04,0.05,0.06,0.07,0.08,0.09,0.1,0.15,0.2,0.25	91.5492	5578	8	99.8568	0.143215
paired100	class	50	4	1	80	20		90.5375	5574	7	99.8746	0.125426
paired100	class	55	3	0	100	0	0.005,0.01	89.5485	5570	6	99.8924	0.107604
paired100	class	60	5	0	100	0		88.6284	5567	6	99.8923	0.107662
paired100	class	65	2	0	100	0		87.3734	5562	6	99.8922	0.107759
paired100	class	70	4	0	100	0		86.0214	5560	6	99.8922	0.107797
paired100	class	75	10	0	100	0		84.3471	5556	6	99.8921	0.107875
paired100	class	80	17	0	100	0		82.2964	5546	6	99.8919	0.108069
paired100	class	85	24	1	96	4		80.3427	5529	6	99.8916	0.108401
paired100	class	90	56	0	100	0	0.001	77.5941	5505	5	99.9093	0.090744
paired100	class	95	670	1	99.851	0.149031		74.3064	5449	5	99.9083	0.091676
paired100	class	100	4779	4	99.9164	0.08363		54.0615	4779	4	99.9164	0.08363
paired100	phylum	0	0	0	NA	NA	0.4	100	5614.5	11	99.8045	0.195538
paired100	phylum	5	0	0	NA	NA		99.9977	5614.5	11	99.8045	0.195538
paired100	phylum	10	0	1	0	100		99.9705	5614.5	11	99.8045	0.195538
paired100	phylum	15	0	1	0	100		99.8088	5614.5	10	99.8222	0.177794
paired100	phylum	20	0	3	0	100		99.4684	5614.5	9	99.84	0.160043
paired100	phylum	25	0	1	0	100	0.25,0.3,0.35	98.9337	5614.5	6	99.8932	0.106752
paired100	phylum	30	0	0	NA	NA	0.05,0.06,0.07,0.08,0.09,0.1,0.15,0.2	98.249	5614.5	5	99.911	0.088976
paired100	phylum	35	2	1	66.6667	33.3333	0.03,0.04	97.5985	5614.5	5	99.911	0.088976
paired100	phylum	40	0.5	1	33.3333	66.6667		96.8781	5612.5	4	99.9288	0.071219
paired100	phylum	45	2	1	66.6667	33.3333	0.02	96.1095	5612	3	99.9466	0.053428
paired100	phylum	50	3	0	100	0	0.01	95.1287	5610	2	99.9644	0.035638
paired100	phylum	55	2	0	100	0		94.1658	5607	2	99.9643	0.035657
paired100	phylum	60	2	0	100	0		93.2371	5605	2	99.9643	0.03567
paired100	phylum	65	1	0	100	0		92.1125	5603	2	99.9643	0.035682
paired100	phylum	70	4	0	100	0		90.9724	5602	2	99.9643	0.035689
paired100	phylum	75	3	0	100	0		89.2618	5598	2	99.9643	0.035714
paired100	phylum	80	8	1	88.8889	11.1111		87.6174	5595	2	99.9643	0.035733
paired100	phylum	85	15	0	100	0	0.001,0.005	86.0529	5587	1	99.9821	0.017895
paired100	phylum	90	39	0	100	0		84.3097	5572	1	99.9821	0.017944
paired100	phylum	95	457	0	100	0		80.7643	5533	1	99.9819	0.01807
paired100	phylum	100	5076	1	99.9803	0.019697		61.1159	5076	1	99.9803	0.019697
paired120	genus	0	0	1	0	100	0.85	99.6074	4532	923	83.0797	16.9203
paired120	genus	5	0	8	0	100		99.3469	4532	922	83.095	16.905
paired120	genus	10	1	16	5.88235	94.1176		98.0219	4532	914	83.217	16.783
paired120	genus	15	1	22	4.34783	95.6522		94.9277	4531	898	83.4592	16.5408
paired120	genus	20	6	25	19.3548	80.6452	0.75,0.8	91.4643	4530	876	83.7958	16.2042
paired120	genus	25	11	43	20.3704	79.6296		87.0843	4524	851	84.1674	15.8326
paired120	genus	30	16	62	20.5128	79.4872	0.7	82.8255	4513	808	84.8149	15.1851
paired120	genus	35	33.5	61	35.4497	64.5503	0.6,0.65	78.4251	4497	746	85.7715	14.2285
paired120	genus	40	41	61	40.1961	59.8039	0.55	74.1232	4463.5	685	86.6952	13.3048
paired120	genus	45	46.5	63	42.4658	57.5342	0.5	70.0889	4422.5	624	87.635	12.365
paired120	genus	50	59	66	47.2	52.8	0.45	66.3509	4376	561	88.6368	11.3632
paired120	genus	55	83	60	58.042	41.958	0.4	62.1109	4317	495	89.7132	10.2868
paired120	genus	60	109	64	63.0058	36.9942	0.35	57.6448	4234	435	90.6832	9.31677
paired120	genus	65	108	50	68.3544	31.6456	0.3	53.7786	4125	371	91.7482	8.25178
paired120	genus	70	105	44	70.4698	29.5302	0.25	50.8486	4017	321	92.6003	7.39972
paired120	genus	75	132	48	73.3333	26.6667		48.1956	3912	277	93.3874	6.61256
paired120	genus	80	180	44	80.3571	19.6429	0.2	45.6285	3780	229	94.2879	5.71215
paired120	genus	85	231	43	84.3066	15.6934	0.15	42.575	3600	185	95.1123	4.88772
paired120	genus	90	393	48	89.1156	10.8844	0.09,0.1	38.7033	3369	142	95.9556	4.04443
paired120	genus	95	1779.5	78	95.8008	4.19919	0.04,0.05,0.06,0.07,0.08	33.9197	2976	94	96.9381	3.06189
paired120	genus	100	1196.5	16	98.6804	1.31959	0.01,0.02,0.03	15.3553	1196.5	16	98.6804	1.31959
paired120	family	0	0	0	NA	NA	0.6	99.796	5216	177.5	96.709	3.291
paired120	family	5	0	2	0	100		99.7272	5216	177.5	96.709	3.291
paired120	family	10	0	1	0	100		99.2453	5216	175.5	96.7449	3.25512
paired120	family	15	0	4	0	100		97.8226	5216	174.5	96.7628	3.23718
paired120	family	20	2	6	25	75		95.539	5216	170.5	96.8347	3.16532
paired120	family	25	2	7	22.2222	77.7778		92.6272	5214	164.5	96.9415	3.05847
paired120	family	30	3	11	21.4286	78.5714		90.0326	5212	157.5	97.0668	2.93323
paired120	family	35	5	13	27.7778	72.2222	0.5,0.55	87.5466	5209	146.5	97.2645	2.73551
paired120	family	40	11	11.5	48.8889	51.1111	0.35,0.4,0.45	85.2587	5204	133.5	97.4988	2.50117
paired120	family	45	14.5	11	56.8627	43.1373	0.3	83.5335	5193	122	97.7046	2.29539
paired120	family	50	24	8	75	25	0.2,0.25	81.6969	5178.5	111	97.9015	2.0985
paired120	family	55	47	17	73.4375	26.5625		79.924	5154.5	103	98.0409	1.95911
paired120	family	60	40	10	80	20	0.15	78.1469	5107.5	86	98.3441	1.65592
paired120	family	65	45	7	86.5385	13.4615	0.09,0.1	76.0774	5067.5	76	98.5224	1.47759
paired120	family	70	60	10	85.7143	14.2857	0.08	74.1695	5022.5	69	98.6448	1.3552
paired120	family	75	67	7	90.5405	9.45946	0.05,0.06,0.07	72.2266	4962.5	59	98.8251	1.17495
paired120	family	80	107	7	93.8596	6.14035	0.04	70.1792	4895.5	52	98.949	1.05104
paired120	family	85	126	6	95.4545	4.54545		67.616	4788.5	45	99.069	0.931002
paired120	family	90	245	13	94.9612	5.03876		64.3677	4662.5	39	99.1705	0.829522
paired120	family	95	1958.5	16	99.1897	0.810332	0.01,0.02,0.03	59.8608	4417.5	26	99.4149	0.585124
paired120	family	100	2459	10	99.595	0.405022	0.005	34.36	2459	10	99.595	0.405022
paired120	order	0	0	0	NA	NA	0.55	99.9958	5523.5	54	99.0318	0.968176
paired120	order	5	1	1	50	50		99.9757	5523.5	54	99.0318	0.968176
paired120	order	10	0	1	0	100		99.7298	5522.5	53	99.0494	0.950587
paired120	order	15	0	1	0	100		98.9185	5522.5	52	99.0672	0.932819
paired120	order	20	1	4	20	80		97.5819	5522.5	51	99.085	0.915044
paired120	order	25	0	5	0	100	0.5	96.2386	5521.5	47	99.156	0.844033
paired120	order	30	1	3	25	75	0.3,0.35,0.4,0.45	94.6855	5521.5	42	99.2451	0.75492
paired120	order	35	1	1	50	50	0.25	93.0989	5520.5	39	99.2985	0.701502
paired120	order	40	3	3	50	50		91.3529	5519.5	38	99.3162	0.683761
paired120	order	45	3	3	50	50	0.2	89.6488	5516.5	35	99.3695	0.63046
paired120	order	50	5.5	3	64.7059	35.2941		88.1721	5513.5	32	99.423	0.577044
paired120	order	55	6	4	60	40		86.807	5508	29	99.4763	0.523749
paired120	order	60	7	4	63.6364	36.3636		85.4376	5502	25	99.5477	0.452325
paired120	order	65	12	3	80	20	0.06,0.07,0.08,0.09,0.1,0.15	83.7344	5495	21	99.6193	0.380711
paired120	order	70	12	2	85.7143	14.2857	0.03,0.04,0.05	82.0278	5483	18	99.6728	0.327213
paired120	order	75	18	0	100	0	0.02	80.5049	5471	16	99.7084	0.291598
paired120	order	80	24	2	92.3077	7.69231		78.7304	5453	16	99.7074	0.292558
paired120	order	85	64	1	98.4615	1.53846	0.005,0.01	76.4197	5429	14	99.7428	0.257211
paired120	order	90	113	1	99.1228	0.877193		73.5954	5365	13	99.7583	0.241726
paired120	order	95	1234	3	99.7575	0.242522		69.5152	5252	12	99.772	0.227964
paired120	order	100	4018	9	99.7765	0.223491		44.2039	4018	9	99.7765	0.223491
paired120	class	0	0	0	NA	NA	0.5	99.9969	5585.5	19	99.661	0.339013
paired120	class	5	0	0	NA	NA		99.993	5585.5	19	99.661	0.339013
paired120	class	10	0	1	0	100		99.8701	5585.5	19	99.661	0.339013
paired120	class	15	0	2	0	100		99.4827	5585.5	18	99.6788	0.321228
paired120	class	20	1	2	33.3333	66.6667		98.7978	5585.5	16	99.7144	0.285638
paired120	class	25	0	4	0	100		97.8798	5584.5	14	99.7499	0.250067
paired120	class	30	0	2	0	100	0.25,0.3,0.35,0.4,0.45	96.7661	5584.5	10	99.8213	0.178747
paired120	class	35	1	0	100	0	0.1,0.15,0.2	95.499	5584.5	8	99.857	0.143049
paired120	class	40	1	0	100	0	0.08,0.09	94.2428	5583.5	8	99.8569	0.143074
paired120	class	45	2	0	100	0		93	5582.5	8	99.8569	0.1431
paired120	class	50	3	0	100	0		91.6875	5580.5	8	99.8568	0.143151
paired120	class	55	4	2	66.6667	33.3333		90.6419	5577.5	8	99.8568	0.143228
paired120	class	60	3	0	100	0	0.005,0.01,0.02,0.03,0.04,0.05,0.06,0.07	89.7426	5573.5	6	99.8925	0.107537
paired120	class	65	6	0	100	0		88.8605	5570.5	6	99.8924	0.107594
paired120	class	70	3	0	100	0		87.8063	5564.5	6	99.8923	0.10771
paired120	class	75	8	0	100	0		86.6339	5561.5	6	99.8922	0.107768
paired120	class	80	7	0	100	0		85.2737	5553.5	6	99.8921	0.107923
paired120	class	85	20	1	95.2381	4.7619		83.3781	5546.5	6	99.8919	0.108059
paired120	class	90	43	0	100	0	0.001	80.6231	5526.5	5	99.9096	0.090391
paired120	class	95	529	1	99.8113	0.188679		76.9189	5483.5	5	99.9089	0.0911
paired120	class	100	4954.5	4	99.9193	0.08067		57.6031	4954.5	4	99.9193	0.08067
paired120	phylum	0	0	0	NA	NA	0.25	100	5614	8	99.8577	0.142298
paired120	phylum	5	0	0	NA	NA		99.9984	5614	8	99.8577	0.142298
paired120	phylum	10	0	1	0	100		99.9557	5614	8	99.8577	0.142298
paired120	phylum	15	0	2	0	100		99.7909	5614	7	99.8755	0.124533
paired120	phylum	20	0	1	0	100		99.4674	5614	5	99.911	0.088984
paired120	phylum	25	0	2	0	100		99.0312	5614	4	99.9288	0.0712
paired120	phylum	30	1	0	100	0	0.03,0.04,0.05,0.06,0.07,0.08,0.09,0.1,0.15,0.2	98.4263	5614	2	99.9644	0.035613
paired120	phylum	35	1	0	100	0	0.02	97.7585	5613	2	99.9644	0.035619
paired120	phylum	40	1	0	100	0		97.0533	5612	2	99.9644	0.035625
paired120	phylum	45	2	0	100	0		96.439	5611	2	99.9644	0.035632
paired120	phylum	50	1	0	100	0		95.7914	5609	2	99.9644	0.035644
paired120	phylum	55	0	0	NA	NA		95.0636	5608	2	99.9643	0.035651
paired120	phylum	60	1	0	100	0		94.3118	5608	2	99.9643	0.035651
paired120	phylum	65	2	0	100	0		93.4114	5607	2	99.9643	0.035657
paired120	phylum	70	0	0	NA	NA		92.5717	5605	2	99.9643	0.03567
paired120	phylum	75	4	0	100	0		91.4965	5605	2	99.9643	0.03567
paired120	phylum	80	3	1	75	25		90.0993	5601	2	99.9643	0.035695
paired120	phylum	85	10	0	100	0	0.001,0.005,0.01	88.3017	5598	1	99.9821	0.01786
paired120	phylum	90	27	0	100	0		86.0928	5588	1	99.9821	0.017892
paired120	phylum	95	363	0	100	0		83.0621	5561	1	99.982	0.017979
paired120	phylum	100	5198	1	99.9808	0.019234		64.2722	5198	1	99.9808	0.019234
